# Supplementary material for: Understanding the power of luminescence ratiometric thermal history indicators driven by phase transitions: the case of Eu3+ doped LaVO4
Source: Royal Society of Chemistry journal article supplement (doi:10.1039/d3dt00601h), 2023-01-01
Supplement: d3dt00601h1.pdf [file d3dt00601h1.pdf]

## SUPPORTING INFORMATION

# Understanding the Power of Luminescence Ratiometric Thermal History Indicators driven by Phase Transitions: The case of $\text{Eu}^{3+}$ doped $\text{LaVO}_4$

K. Elzbieciak-Piecka<sup>1\*</sup>, W. M. Piotrowski<sup>1</sup>, M. D. Dramicanin<sup>2</sup>, L. Marciniak<sup>1\*</sup>

<sup>1</sup> Institute of Low Temperatures and Structure Research PAS, Wrocław, Poland

<sup>2</sup> Centre of Excellence for Photoconversion, Vinča Institute of Nuclear Sciences – National Institute of the Republic of Serbia, University of Belgrade, P.O. Box 522, Belgrade 11001, Serbia

\*e-mail [k.elzbieciak@intibs.pl](mailto:k.elzbieciak@intibs.pl), [l.marciniak@intibs.pl](mailto:l.marciniak@intibs.pl)

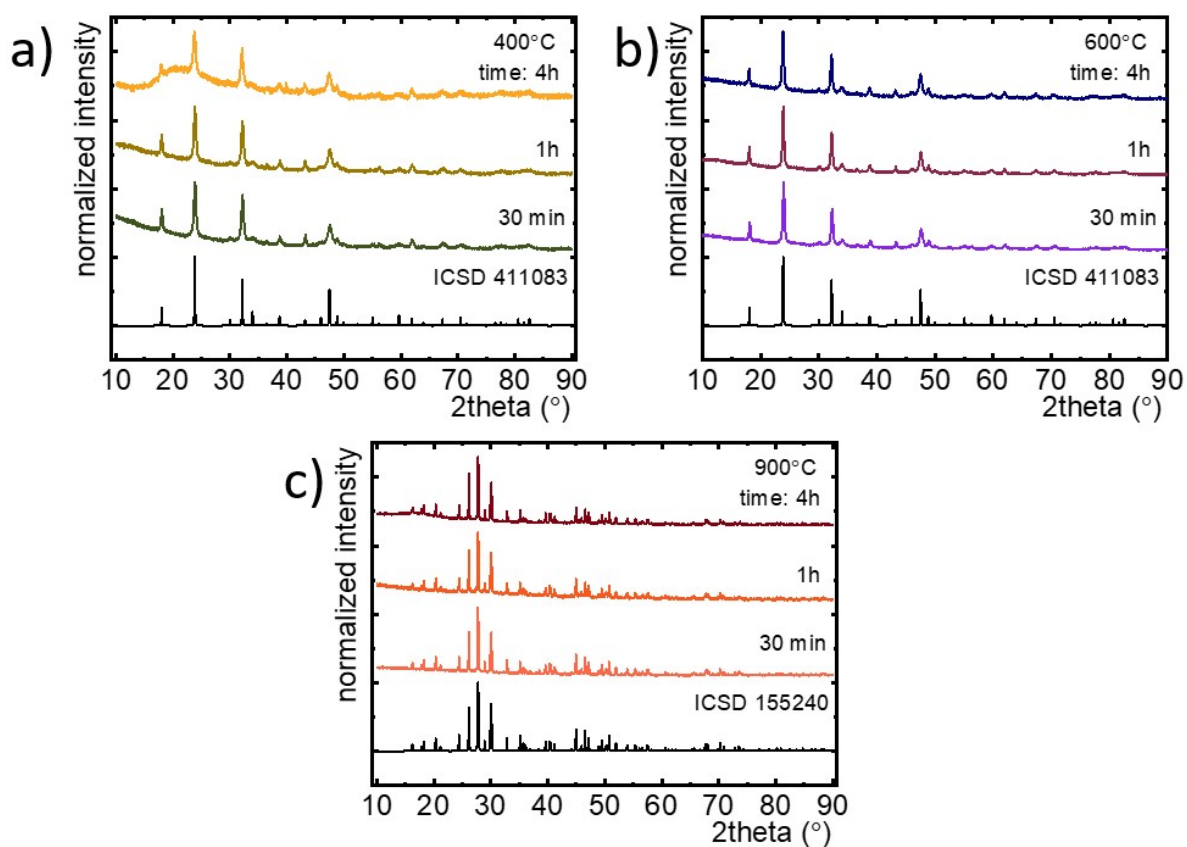

**Figure S1.** The comparison of XRD patterns for  $\text{LaVO}_4:1\%\text{Eu}^{3+}$  annealed at: 400°C -a), 600°C -b) and 900°C -c) as a function of time.

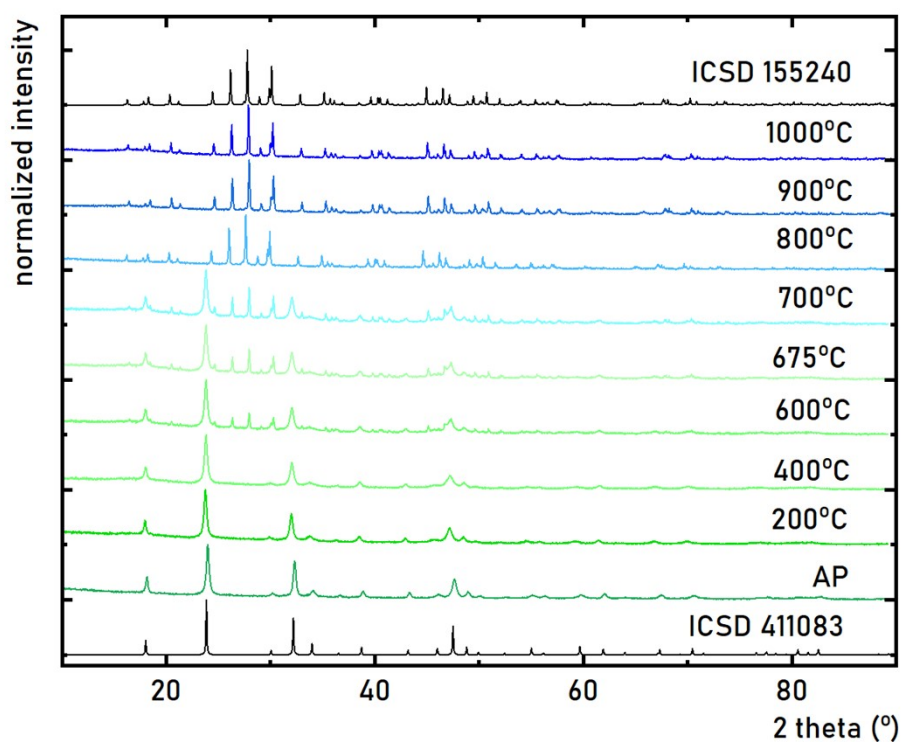

**Figure S2.** The XRD patterns of  $\text{LaVO}_4:1\%\text{Eu}^{3+}$  annealed at different temperatures.

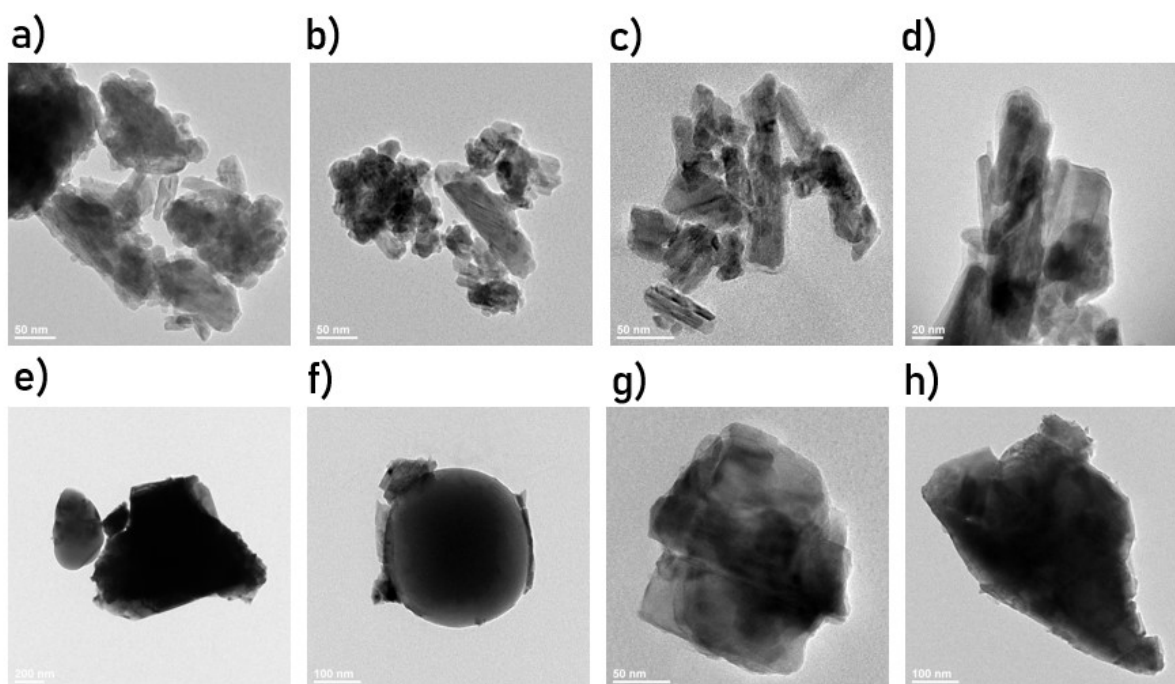

**Figure S3.** The TEM images of the  $\text{LaVO}_4:\text{Eu}^{3+}$  annealed at 400°C-a-d); and at 800°C e-h).

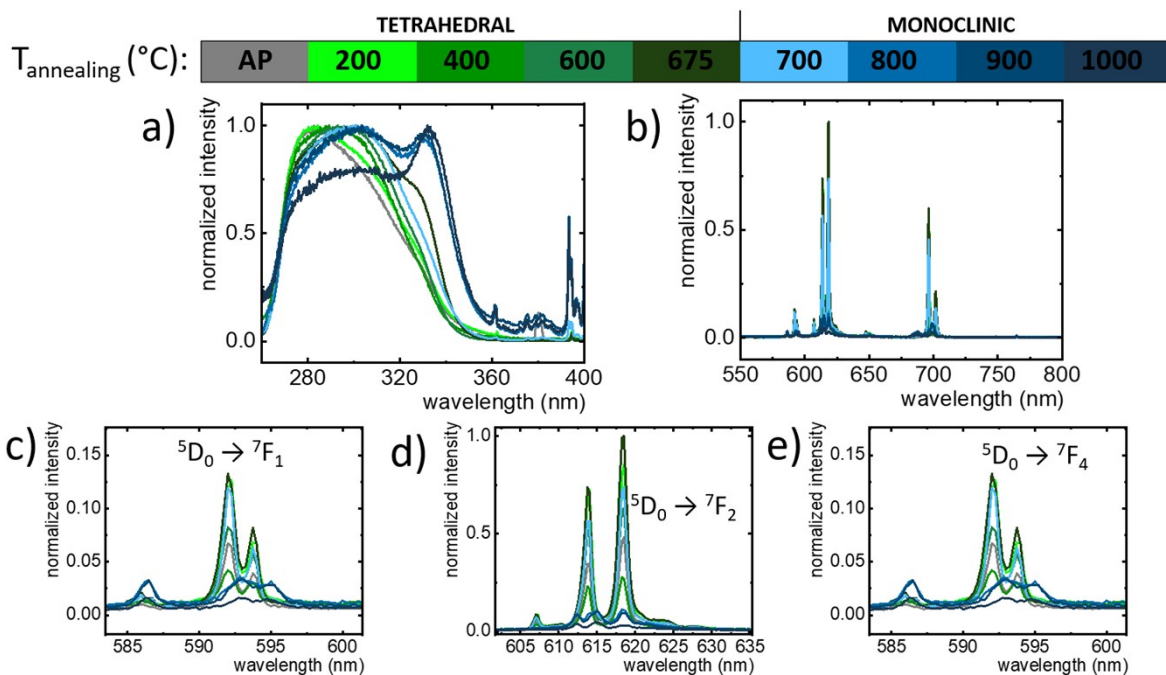

**Figure S4.** The comparison of excitation spectra upon monitoring the emission at 618 nm – a) and emission spectra upon excitation at 266 nm – b) as a function of annealing temperature for tetrahedral and monoclinic  $\text{LaVO}_4:1\%\text{Eu}^{3+}$  nanocrystals; magnified view of particular emission bands of  $\text{Eu}^{3+}$  ions:  $^5\text{D}_0 \rightarrow ^7\text{F}_1$  – c),  $^5\text{D}_0 \rightarrow ^7\text{F}_2$  – d) and  $^5\text{D}_0 \rightarrow ^7\text{F}_4$  – e) obtained at RT.

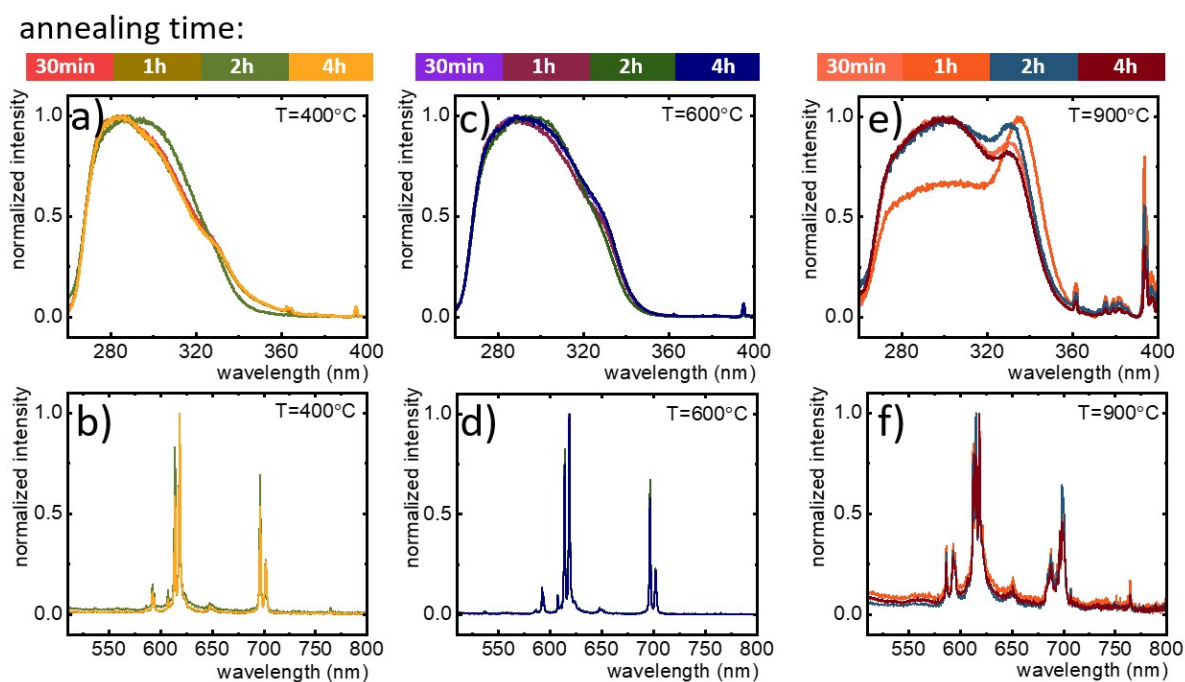

**Figure S5.** The comparison of excitation spectra upon monitoring the emission at 618 nm – a, c, e) and emission spectra upon excitation at 266 nm – b, d, f) as a function of annealing time for Eu<sup>3+</sup>-doped LaVO<sub>4</sub> nanocrystals annealed at 400°C, 600°C and 900°C obtained at RT.

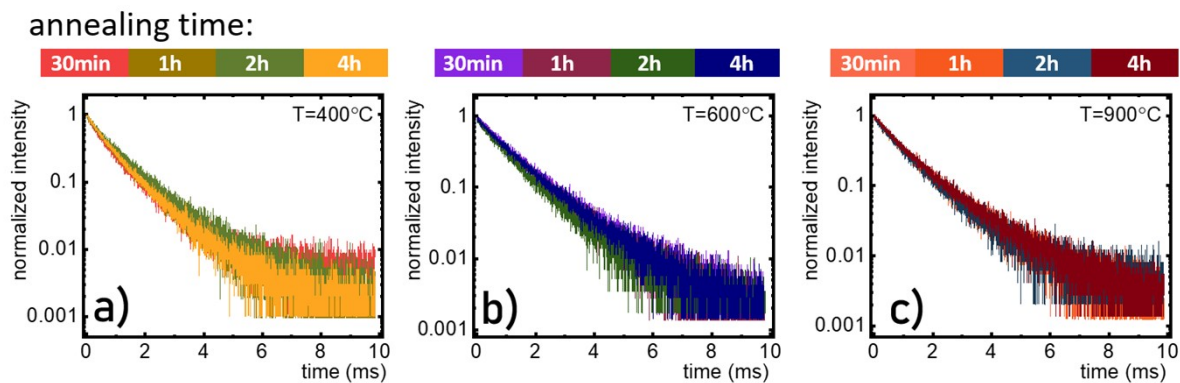

**Figure S6.** Luminescence decay curve from <sup>5</sup>D<sub>0</sub> state of Eu<sup>3+</sup> ions in LaVO<sub>4</sub>:Eu<sup>3+</sup> annealed at 400°C-a), 600°C-b) and 900°C-c) for different time.

The LIR vs annealing temperature dependence presented in Figure 3c can be fitted using the following polynomial function:

$$LIR = 14.83 - 0.062T + 2.51 \cdot 10^{-4} T^2 - 3.61 \cdot 10^{-7} T^3 + 1.62 \cdot 10^{-10} T^4 \quad (S1)$$

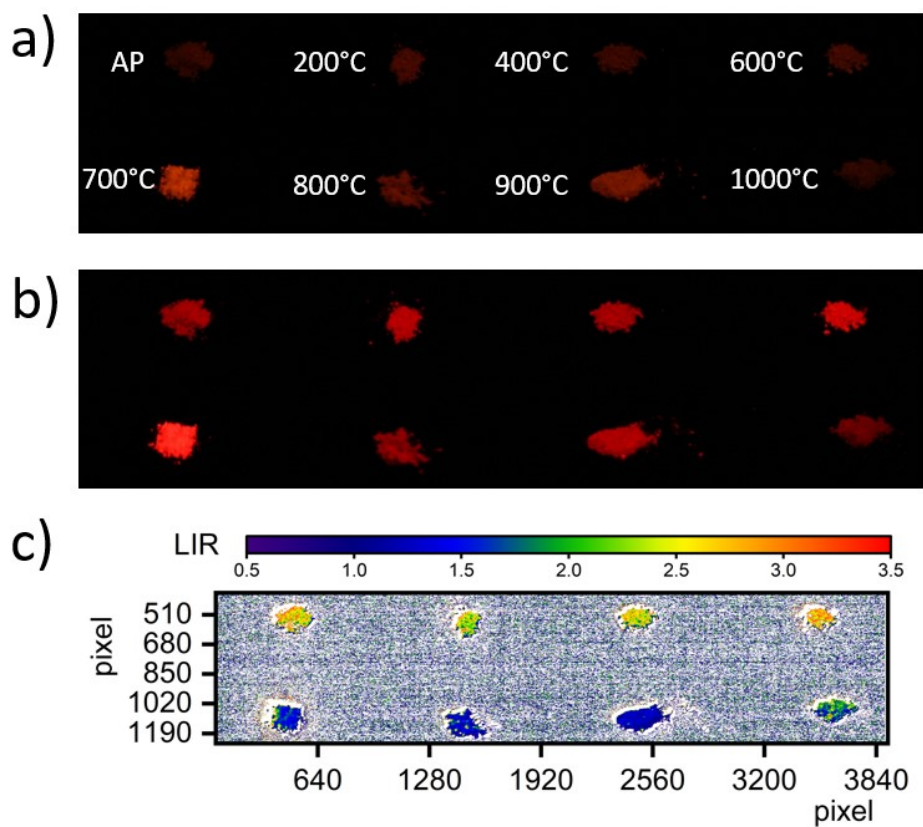

**Figure S7.** The photographs of the series of LaVO<sub>4</sub>:1% Eu<sup>3+</sup> nanocrystals AP and annealed at 200°C, 400°C, 600°C, 700°C, 800°C, 900°C, 1000°C taken with the use of 590 nm – a) and 620 nm – b) bandpass filters, the map of LIR distribution – c).

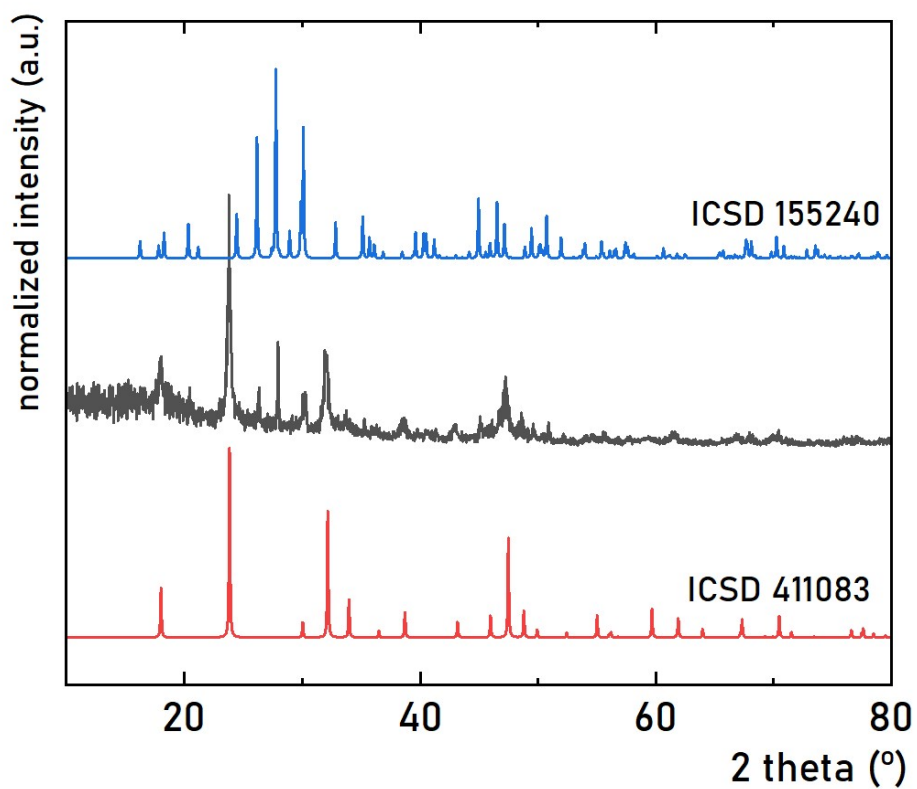

**Figure S8.** The XRD pattern of  $\text{LaVO}_4:1\% \text{Eu}^{3+}$  annealed at  $600^\circ\text{C}$  for 5 minutes.
